# Supplementary material for: Contributions of weak interactions to the inclusion complexation of 3-hydroxynaphthalene-2-carboxylic acid and its analogues with cyclodextrins†
Source: Royal Society of Chemistry journal article supplement (doi:10.1039/a905463d), 2000-01-01
Supplement: a905463d.doc [file a905463d.doc]

**Supplementary data**

**Contributions of weak interactions to the inclusion complexation of 3-hydroxy-2-naphthalenecarboxylic acid and its analogues with cyclodextrins**

**Zheng-Ping Yi, Hui-Lan Chen,* Zheng-Zi Huang, Qing Huang and Jun-Shen Yu**

*State Key Laboratory and Institute of Coordination Chemistry, Department of Chemistry, Nanjing University, Nanjing, 210093, P. R. China*

**Fig. 1** Fluorescence spectra change of 3H2NA at various -CD concentrations. [3H2NA] = 1.8  10-5 M, [-CD]t: (a) 0.00; (b) 0.88; (c) 1.23; (d) 1.79; (e) 2.46; (f) 3.51; (g) 4.92; (h) 6.89 10 -3 M, pH = 7.0, T = 25 C.

**Fig. 2** Double-reciprocal plots of *F*-1 *vs*. [TM-CD]t -1. *T* = 25 C. (a) pH = 7.0, [3H2NA] = 9.3  10-6 M; (b) pH = 10.8, [3H2NA] = 4.5  10-6 M; (c) pH = 11.5, [3H2NA] = 4.5  10-6 M; (d) pH = 1.5, [3H2NA] = 1.8  10-5 M; (e) pH = 2.4, [3H2NA] = 1.8  10-5 M.

**Fig. 3** Double-reciprocal plots of *IF*-1 *vs*. [TM-CD]t-1. *T* = 25 C. pH = 7.0, [3H2NA] = 9.3  10-6 M, [TM-CD]t = 4.43  10-4-3.55  10-3 M. (a) *T* = 5 C, (b) *T* = 15 C, (c) *T* = 25 C, (d) *T* = 35 C, (e) *T* = 45 C.

**Fig. 4** Enthalpy changes *H* for the reactions of 3H2NA and its analogues with native cyclodextrins (o) and modified cyclodextrins () as respective functions of the entropy changes *S*.
